# Supplementary material for: Impact of 2020 COVID-19 lockdowns on particulate air pollution across Europe
Source: Copernicus journal article supplement (doi:10.5194/egusphere-2023-434), 2023-04-05
Supplement: Supplementary file 1 [file egusphere-2023-434-supplement.pdf]

# Supplement to “Impact of 2020 COVID-19 lockdowns on particulate air pollution across Europe”

J.P. Putaud et al.

Table S1. Regulated air pollutant measurement methods employed at urban sites.

| Site       | PM <sub>10</sub>                    | PM <sub>2.5</sub>                   | NO                | NO <sub>2</sub>                            | O <sub>3</sub> |
|------------|-------------------------------------|-------------------------------------|-------------------|--------------------------------------------|----------------|
| Helsinki   | on-line microbalance                | on-line microbalance                | chemiluminescence | chemiluminescence_<br>Mo converter         | UV absorption  |
| Oslo       | optical particle counting           | optical particle counting           | chemiluminescence | chemiluminescence_<br>Mo converter         | UV absorption  |
| Copenhagen | on-line microbalance                | on-line microbalance                | chemiluminescence | chemiluminescence_<br>Mo converter         | UV absorption  |
| Rotterdam  | $\beta$ -attenuation                | $\beta$ -attenuation                | chemiluminescence | chemiluminescence_<br>Mo converter         | UV absorption  |
| Leipzig    | on-line microbalance                | N/A                                 | chemiluminescence | chemiluminescence_<br>Mo converter         | UV absorption  |
| Brussels   | on-line microbalance <sup>(1)</sup> | on-line microbalance <sup>(1)</sup> | chemiluminescence | chemiluminescence_<br>Mo converter         | UV absorption  |
| Lille      | on-line microbalance <sup>(1)</sup> | on-line microbalance <sup>(1)</sup> | chemiluminescence | chemiluminescence_<br>Mo converter         | UV absorption  |
| Prague     | $\beta$ -attenuation                | $\beta$ -attenuation                | chemiluminescence | chemiluminescence_<br>photolytic converter | UV absorption  |
| Paris      | on-line microbalance <sup>(1)</sup> | N/A                                 | chemiluminescence | chemiluminescence_<br>Mo converter         | UV absorption  |
| Bern       | gravimetric                         | gravimetric                         | chemiluminescence | chemiluminescence_<br>Mo converter         | UV absorption  |
| Milan      | $\beta$ -attenuation                | N/A                                 | chemiluminescence | chemiluminescence_<br>Mo converter         | UV absorption  |
| Barcelona  | gravimetric                         | gravimetric                         | chemiluminescence | chemiluminescence_<br>Mo converter         | UV absorption  |
| Athens     | gravimetric                         | gravimetric                         | chemiluminescence | chemiluminescence_<br>Mo converter         | UV absorption  |
| Seville    | $\beta$ -attenuation                | N/A                                 | chemiluminescence | chemiluminescence_<br>Mo converter         | UV absorption  |
| Granada    | $\beta$ -attenuation                | N/A                                 | chemiluminescence | chemiluminescence_<br>Mo converter         | UV absorption  |
| Nicosia    | on-line microbalance <sup>(1)</sup> | on-line microbalance <sup>(1)</sup> | chemiluminescence | chemiluminescence_<br>photolytic converter | UV absorption  |

(1) with Filter Dynamic Measurement System<sup>®</sup>

Table S2. Regulated air pollutant measurement methods employed at regional background sites.

| Site | PM <sub>10</sub>                    | PM <sub>2.5</sub>         | NO                | NO <sub>2</sub>                            | O <sub>3</sub> |
|------|-------------------------------------|---------------------------|-------------------|--------------------------------------------|----------------|
| HYY  | gravimetric                         | gravimetric               | chemiluminescence | chemiluminescence_<br>Mo converter         | UV absorption  |
| BIR  | gravimetric                         | gravimetric               | chemiluminescence | iodide impregnated<br>glass sinter         | UV absorption  |
| RIS  | gravimetric                         | gravimetric               | chemiluminescence | chemiluminescence_<br>Mo converter         | UV absorption  |
| CBW  | β-attenuation                       | β-attenuation             | chemiluminescence | chemiluminescence_<br>Mo converter         | UV absorption  |
| MEL  | gravimetric                         | gravimetric               | chemiluminescence | chemiluminescence_<br>Mo converter         | UV absorption  |
| KOS  | gravimetric                         | gravimetric               | chemiluminescence | chemiluminescence_<br>photolytic converter | UV absorption  |
| SIR  | optical particle counting           | optical particle counting | chemiluminescence | chemiluminescence_<br>photolytic converter | UV absorption  |
| PAY  | gravimetric                         | gravimetric               | chemiluminescence | chemiluminescence_<br>Mo converter         | UV absorption  |
| IPR  | on-line microbalance <sup>(1)</sup> | N/A                       | chemiluminescence | chemiluminescence_<br>photolytic converter | UV absorption  |
| MSY  | gravimetric                         | gravimetric               | chemiluminescence | chemiluminescence_<br>Mo converter         | UV absorption  |
| ARN  | β-attenuation                       | N/A                       | chemiluminescence | chemiluminescence_<br>Mo converter         | UV absorption  |
| CYP  | gravimetric                         | gravimetric               | chemiluminescence | chemiluminescence_<br>photolytic converter | UV absorption  |

(1) with Filter Dynamic Measurement System<sup>®</sup>

Table S3. Multi-wavelength aerosol light absorption and particle number size distribution instruments employed at urban and regional background sites.

| Site       | Time period | multi-WL light absorption <sup>1)</sup> |               | particle number size distribution |                  |                  |
|------------|-------------|-----------------------------------------|---------------|-----------------------------------|------------------|------------------|
|            |             | instrument type <sup>1)</sup>           | WL range (nm) | instrument type <sup>2)</sup>     | lower bound (nm) | upper bound (nm) |
| Helsinki   | 2017-2020   | N/A                                     | N/A           | DMPS                              | 3                | 794              |
| Oslo       | 2017-2020   | AE33                                    | 370 - 950     | N/A                               | N/A              | N/A              |
| Copenhagen | 2017-2020   | N/A                                     | N/A           | SMPS                              | 40               | 478              |
| Rotterdam  | 2019-2020   | N/A                                     | N/A           | N/A                               | N/A              | N/A              |
| Leipzig    | 2017-2020   | N/A                                     | N/A           | SMPS                              | 10               | 800              |
| Brussels   | 2017-2020   | AE31                                    | 370 - 950     | N/A                               | N/A              | N/A              |
| Lille      | 2017-2020   | AE33                                    | 370 - 950     | SMPS                              | 16               | 800              |
| Bern       | 2018-2020   | AE33 <sup>3)</sup>                      | 370 - 950     | N/A                               | N/A              | N/A              |
| Milan      | 2019-2020   | N/A                                     | N/A           | N/A                               | N/A              | N/A              |
| Barcelona  | 2017-2020   | AE33                                    | 370 - 950     | SMPS                              | 11               | 478              |
| Athens     | 2017-2020   | AE33                                    | 370 - 950     | SMPS                              | 10               | 550              |
| Granada    | 2017-2020   | N/A                                     | N/A           | SMPS                              | 11               | 496              |
| Nicosia    | 2017-2020   | AE33                                    | 370 - 950     | N/A                               | N/A              | N/A              |
| HYY        | 2017-2020   | CLAP                                    | 467 - 652     | DMPS                              | 3                | 1000             |
| BIR        | 2017-2020   | PSAP                                    | 470 - 660     | DMPS                              | 10               | 800              |
| RIS        | 2017-2020   | N/A                                     | N/A           | SMPS                              | 40               | 478              |
| MEL        | 2017-2020   | N/A                                     | N/A           | SMPS                              | 5                | 800              |
| KOS        | 2017-2020   | AE33                                    | 470 - 660     | SMPS                              | 9                | 845              |
| SIR        | 2017-2020   | AE33                                    | 370 - 950     | N/A                               | N/A              | N/A              |
| PAY        | 2017-2020   | AE33                                    | 370 - 950     | N/A                               | N/A              | N/A              |
| IPR        | 2017-2020   | AE31                                    | 370 - 950     | DMPS                              | 10               | 800              |
| MSY        | 2017-2020   | AE33                                    | 370 - 950     | SMPS                              | 9                | 856              |
| ARN        | 2019-2020   | CLAP                                    | 467 - 652     | SMPS                              | 14               | 673              |

1: AE = aethalometer<sup>®</sup>, CLAP = continuous light absorption photometer, PSAP = particle soot absorption photometer

2: DMPS = differential mobility particle sizer, SMPS = scanning mobility particle sizer

3: AE31 until November 2018

Table S4. Coefficients of determination of the linear regression between daily CAMS ensemble forecast and observation data in February-May 2019 across the sites considered in this study. Coefficients  $\geq 0.5$  (1 significant digit) in bold.

|            | NO <sub>2</sub> | NO          | O <sub>3</sub> | PM <sub>10</sub> | PM <sub>2.5</sub> |
|------------|-----------------|-------------|----------------|------------------|-------------------|
| Helsinki   | <b>0.46</b>     | 0.25        | 0.32           | 0.29             | <b>0.54</b>       |
| Oslo       | <b>0.46</b>     | <b>0.49</b> | <b>0.67</b>    | 0.13             | <b>0.56</b>       |
| Copenhagen | <b>0.46</b>     | 0.23        | <b>0.61</b>    | <b>0.63</b>      | <b>0.68</b>       |
| Rotterdam  | <b>0.70</b>     | <b>0.85</b> | <b>0.79</b>    | <b>0.63</b>      | <b>0.77</b>       |
| Leipzig    | <b>0.78</b>     | <b>0.63</b> | <b>0.65</b>    | <b>0.73</b>      | N/A               |
| Brussels   | <b>0.77</b>     | <b>0.64</b> | <b>0.66</b>    | <b>0.80</b>      | <b>0.80</b>       |
| Lille      | <b>0.58</b>     | 0.38        | <b>0.75</b>    | <b>0.74</b>      | <b>0.80</b>       |
| Prague     | <b>0.54</b>     | <b>0.48</b> | <b>0.61</b>    | <b>0.65</b>      | <b>0.64</b>       |
| Paris      | <b>0.72</b>     | <b>0.76</b> | <b>0.75</b>    | <b>0.73</b>      | N/A               |
| Bern       | <b>0.64</b>     | <b>0.57</b> | <b>0.71</b>    | <b>0.59</b>      | <b>0.54</b>       |
| Milan      | <b>0.73</b>     | <b>0.82</b> | <b>0.82</b>    | <b>0.71</b>      | N/A               |
| Barcelona  | <b>0.56</b>     | <b>0.58</b> | <b>0.78</b>    | <b>0.53</b>      | <b>0.58</b>       |
| Athens     | 0.29            | 0.34        | 0.17           | 0.36             | <b>0.62</b>       |
| Seville    | <b>0.47</b>     | N/A         | 0.41           | <b>0.50</b>      | N/A               |
| Granada    | <b>0.56</b>     | 0.40        | <b>0.68</b>    | 0.37             | 0.07              |
| Nicosia    | 0.38            | 0.24        | <b>0.58</b>    | <b>0.49</b>      | 0.36              |
| HYY        | <b>0.81</b>     | 0.35        | 0.43           | 0.37             | <b>0.50</b>       |
| BIR        | 0.11            | N/A         | <b>0.56</b>    | <b>0.61</b>      | <b>0.74</b>       |
| RIS        | <b>0.60</b>     | 0.27        | 0.42           | <b>0.60</b>      | <b>0.67</b>       |
| CBW        | <b>0.83</b>     | <b>0.77</b> | <b>0.81</b>    | <b>0.63</b>      | <b>0.71</b>       |
| MEL        | <b>0.81</b>     | <b>0.69</b> | <b>0.65</b>    | <b>0.59</b>      | <b>0.65</b>       |
| KOS        | <b>0.57</b>     | 0.45        | <b>0.47</b>    | <b>0.70</b>      | <b>0.68</b>       |
| SIR        | <b>0.75</b>     | <b>0.66</b> | <b>0.63</b>    | <b>0.77</b>      | <b>0.76</b>       |
| PAY        | <b>0.72</b>     | <b>0.56</b> | <b>0.64</b>    | <b>0.61</b>      | N/A               |
| IPR        | <b>0.66</b>     | <b>0.57</b> | <b>0.75</b>    | <b>0.63</b>      | N/A               |
| MSY        | <b>0.47</b>     | 0.13        | 0.43           | 0.33             | 0.29              |
| ARN        | <b>0.61</b>     | N/A         | <b>0.77</b>    | 0.00             | N/A               |
| CYP        | 0.20            | 0.06        | 0.44           | <b>0.66</b>      | 0.41              |

Table S5. Regressions between national monthly road fuel consumption (source: EUROSTAT) and monthly mean driving direction request (source: Apple®) indices for the time period January – May 2020. Fuel consumption and driving direction request data are normalised to January 2020 and 13 January 2020 data, respectively.

|                            | gasoline |                            |                | diesel |                            |                |
|----------------------------|----------|----------------------------|----------------|--------|----------------------------|----------------|
|                            | slope    | slope relative uncertainty | R <sup>2</sup> | slope  | slope relative uncertainty | R <sup>2</sup> |
| Finland                    | 0.49     | 41%                        | 0.66           | -0.36  | 37%                        | 0.71           |
| Norway                     | 0.42     | 44%                        | 0.63           | 0.05   | 280%                       | 0.04           |
| Denmark                    | 0.53     | 67%                        | 0.43           | -0.41  | 59%                        | 0.49           |
| Netherlands                | 0.70     | 19%                        | 0.90           | -0.67  | 56%                        | 0.51           |
| Germany                    | 0.48     | 33%                        | 0.76           | -0.19  | 105%                       | 0.23           |
| Belgium                    | 0.88     | 23%                        | 0.86           | -0.03  | 936%                       | 0.00           |
| France                     | 0.80     | 23%                        | 0.86           | 0.39   | 33%                        | 0.76           |
| Czech Republic             | 0.38     | 50%                        | 0.57           | 0.17   | 100%                       | 0.25           |
| Switzerland <sup>(1)</sup> | 0.59     | 25%                        | 0.84           | 0.18   | 95%                        | 0.27           |
| Italy                      | 0.52     | 18%                        | 0.91           | 0.44   | 13%                        | 0.95           |
| Spain                      | 0.71     | 13%                        | 0.95           | 0.37   | 24%                        | 0.85           |
| Greece                     | 0.59     | 20%                        | 0.89           | -0.07  | 240%                       | 0.05           |

(1) Source for fuel consumption: [www.avenergy.ch](http://www.avenergy.ch)

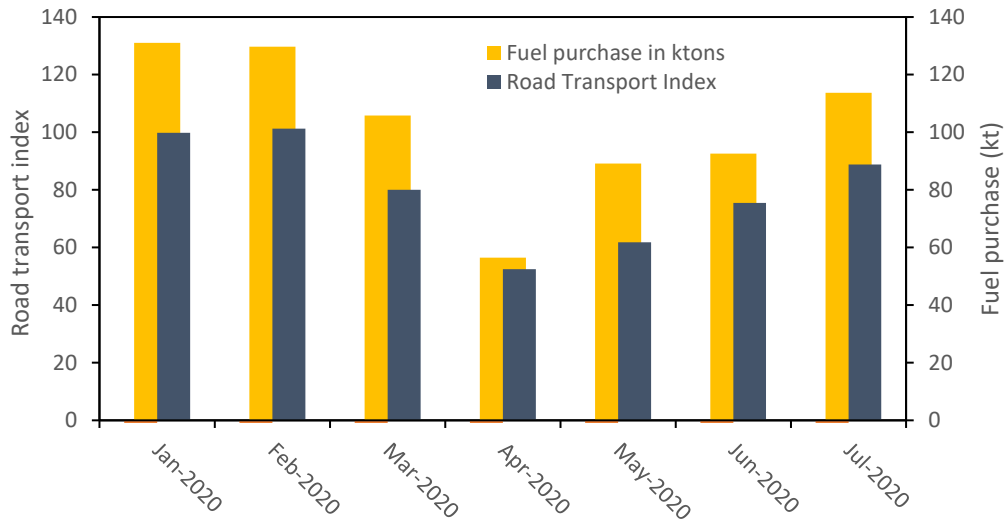

Figure S1. 2020 mobility and fuel purchase data from Cyprus (source: //library.cystat.gov.cy/NEW/MONTH-ECON\_IND-TABLE1A1B-JANDEC21-EL-140222.xls). Road transport index 2015 = 100. Fuel purchase is that of oil companies.

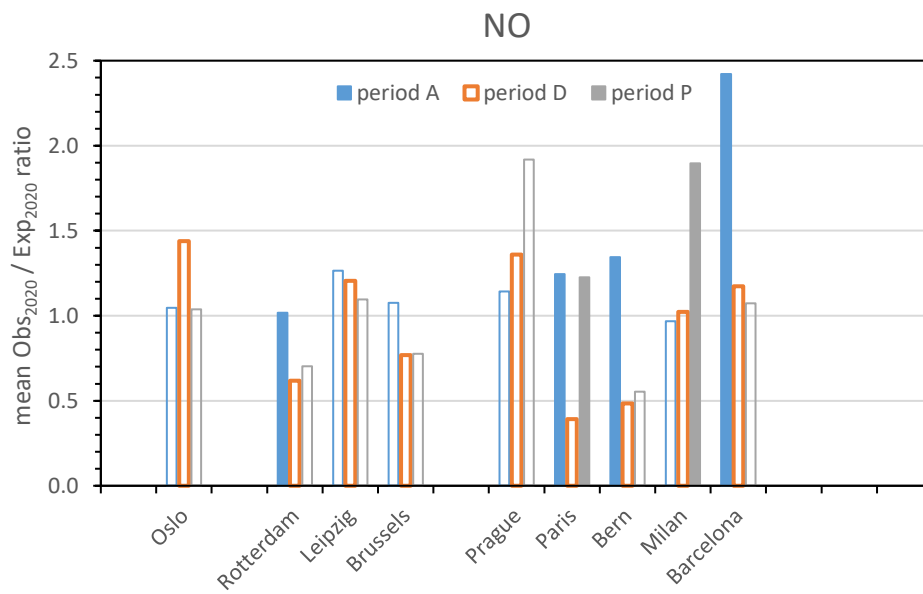

Figure S2. Mean observed / expected NO concentration ratios at urban sites before (A), during (D) and after (P) the lockdown period. Filled bars indicate means which are statistically different from the mean during lockdown period (D) at the 95% confidence level.

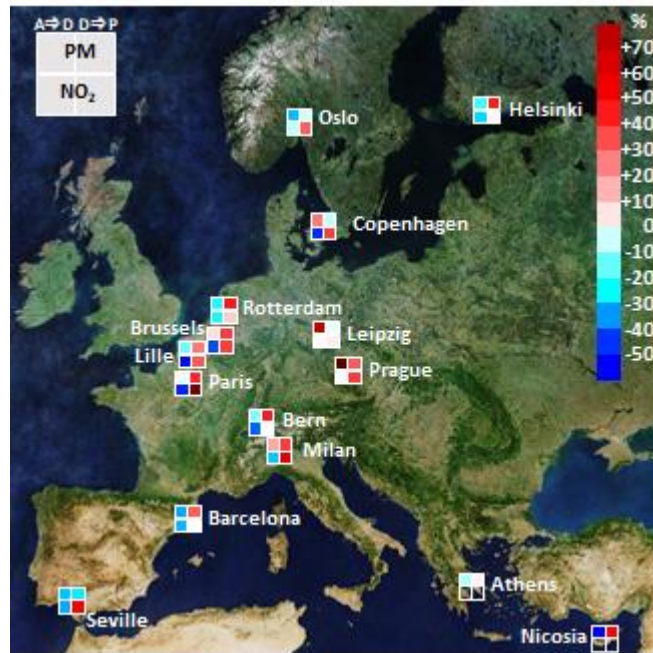

Figure S3: Impacts of lockdown implementations (A⇌D) and relaxations (D⇌P) on PM and NO<sub>2</sub> concentrations at 15 urban sites considered in our study. When available (see Table S1), PM<sub>2.5</sub> data are shown.
